# Supplementary material for: Brain milieu induces early microglial maturation through the BAX-Notch axis
Source: PubMed Central journal article supplement (PMC9576735; doi:10.1038/s41467-022-33836-2), 2022-10-17
Supplement: 41467_2022_33836_MOESM3_ESM.pdf [file 41467_2022_33836_MOESM3_ESM.pdf]

## Description of Additional Supplementary Files

**Supplementary Movie 1. The distribution, morphology and movement behaviours of *coro1a-Dsred<sup>+</sup>* (c-D<sup>+</sup>) cells in the WT and *bax<sup>cq55</sup>* midbrains.** The c-D<sup>+</sup> cells are detected in WT and *bax<sup>cq55</sup>* larval brain. 2 dpf WT c-D<sup>+</sup> cells (PM, asterisks) are morphologically long-and-thin and they move randomly and rapidly, even exiting the observation field. 3 dpf WT c-D<sup>+</sup> cells (AM, arrows) present amoeboid morphologies and they are inert and stay locally. The c-D<sup>+</sup> cells in 3 dpf *bax<sup>cq55</sup>* brain (arrowheads) are morphologically and behaviourally similar to those of 2 dpf counterparts. Time-lapse images are captured for 145 min (1 frame/5 min) and single frame is generated as projections of z stacks of 16 planes with 5  $\mu$ m distance, covering approximately 80  $\mu$ m. The *Tg(*coro1a*:DsRed)* transgenic line is used.

**Supplementary Movie 2. The appearance and increase of apoeb-GFP signal in an amoeboid c-D<sup>+</sup> cell.** A c-D<sup>+</sup> cell performs phagocytosis (arrowheads) and changes to the amoeboid appearance. It then gradually turns on the expression of apoeb-GFP signal. The double transgenic line *Tg(*coro1a*:DsRed; apoeb:GFP)* is used. The imaging is started from 55 hpf and lasts 425 min (1 frame/5 min).

**Supplementary Movie 3. Movement behaviours of *coro1a*-Kaede<sup>+</sup> cells upon apyrase treatment.** Time-lapse imaging reveals the dynamic behaviours of *coro1a*-Kaede<sup>+</sup> microglial cells in the midbrain after application of control buffer or apyrase at 60 hpf. Time-lapse images are captured for 195 min (1 frame/5 min) and single frame is generated as projections of z stacks of 16 planes with 5  $\mu$ m distance, covering approximately 80  $\mu$ m.

**Supplementary Movie 4. The neuronal calcium signals of *bax<sup>cq55</sup>/Tg(HuC:GCaMP6s)* and its sibling.** A continuous imaging of one unilateral optic tectum region of 3 dpf *bax<sup>cq55</sup>/Tg(HuC:GCaMP6s)* and its sibling after injection of Annexin V-Cy5 (magenta). Images are captured at one plane, approximately 30  $\mu$ m in depth. The imaging duration is 16 min 35 sec (1 frame/5 sec).

**Supplementary Movie 5. The neuronal calcium signals in *bax<sup>cq55</sup>/Tg(HuC:GCaMP6s)* after IP3- and glutamate-uncaging.** A continuous imaging of one unilateral optic tectum region of 3 dpf *bax<sup>cq55</sup>/Tg(HuC:GCaMP6s)* after IP3- and glutamate-uncaging. Images are captured at one plane, approximately 30  $\mu$ m in depth. The duration of imaging is 16 min 35 sec (1 frame/5 sec).

**Supplementary Movie 6. The neuronal calcium signals of *Tg(HuC:GCaMP6s)* after treatment with nemadipine or nilvadipine.** A continuous imaging of one unilateral optic tectum region of 3 dpf *Tg(HuC:GCaMP6s)* after the application of nemadipine and nilvadipine. Images are captured at one plane, approximately 30  $\mu$ m in depth. The duration of imaging is 16 min 35 sec (1 frame/5 sec).

**Supplementary Movie 7. The movement behaviours of c-D<sup>+</sup> cells after treatment with nemadipine.** The motility of nemadipine treated c-D<sup>+</sup> cells is more random and active than those in control group (DMSO). The imaging is started at 3 dpf and lasts 525 min. Images of each group are taken every 5 min. Single frame is generated as projections of z stacks of 16 planes with 5  $\mu$ m distance, covering approximately 80  $\mu$ m.
